# Supplementary material for: Safety Evaluation, Biogenic Amine Formation, and Enzymatic Activity Profiles of Autochthonous Enterocin-Producing Greek Cheese Isolates of the Enterococcus faecium/durans Group
Source: MDPI journal article supplement (doi:10.3390/microorganisms9040777), 2021-04-08
Supplement: s1 [file s1]

## SUPPLEMENTAL MATERIAL

### Figure Legends

#### Figure S1

**A)** Agarose gel electrophoresis of multiplex PCR products of *vanA/vanB* in the clinical strain 315VR used as positive control. M:  $\lambda$ DNA/*Hind*III (HT Biotechnologies); 1: *vanA*; 2: *vanA/vanB*, 3: ddH<sub>2</sub>O as negative control.

*vanA* expected product at 545 bp, *vanB* expected product at 368 bp.

**B)** Agarose gel electrophoresis of multiplex PCR products of *vanA/vanB* in the studied control LAB and the *E. faecium* and *E. durans* strains. M:  $\lambda$ DNA/*Hind*III (HT Biotechnologies).

#### Figure S2

**A)** Agarose gel electrophoresis of PCR products for virulence genes *gelE* and *ace* in *E. faecalis* ATCC® 29212™, reference strain. M:  $\lambda$ DNA/*Hind*III (HT Biotechnologies).

Agarose gel electrophoresis of PCR products for virulence genes: **B)** *gelE* and **C)** *ace* in the studied control LAB and the *E. faecium* and *E. durans* strains. M:  $\lambda$ DNA/*Hind*III (HT Biotechnologies).

#### Figure S3

Agarose gel electrophoresis of PCR products for virulence genes: **A)** *IS16*, **B)** *hyl*, **C)** *agg* and **D)** *espA* in the studied control LAB and the *E. faecium* and *E. durans* strains. M:  $\lambda$ DNA/*Hind*III (HT Biotechnologies).
